# Supplementary material for: Early modulation of the gut microbiome by female sex hormones alters amyloid pathology and microglial function
Source: Springer Nature journal article supplement (doi:10.1038/s41598-024-52246-6), 2024-01-21

A Verification of ovariectomy surgery

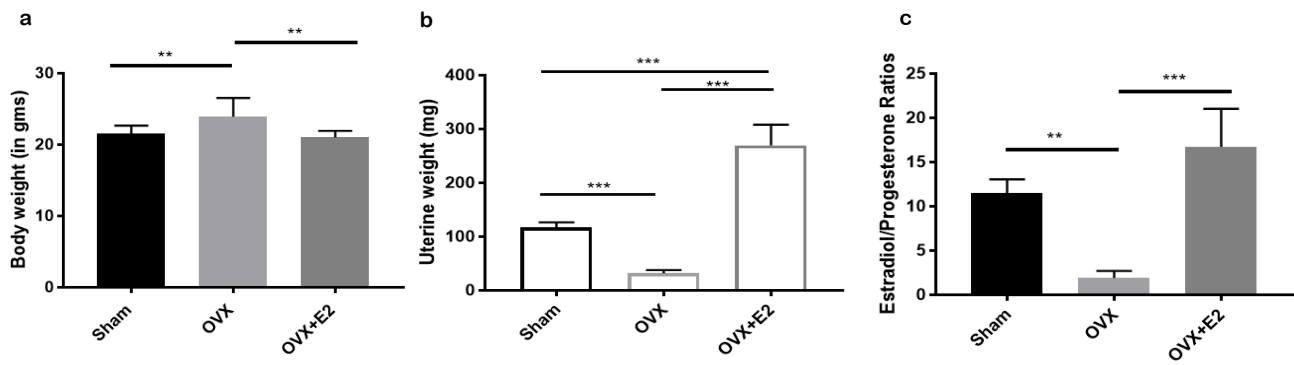

B Western blot to confirm APP full length

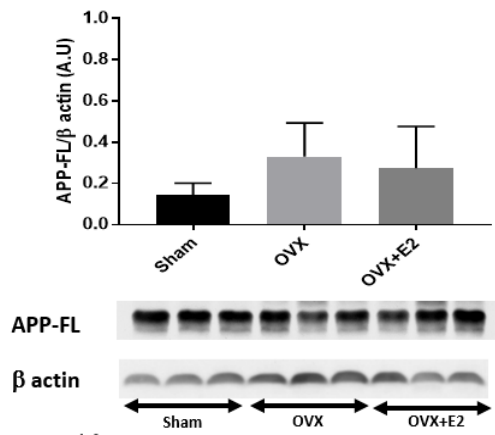

Supplement: MOESM2 [file 41598_2024_52246_MOESM2_ESM.pdf › 41598_2024_52246_MOESM2_ESM.pdf]
