# Supplementary material for: Early modulation of the gut microbiome by female sex hormones alters amyloid pathology and microglial function
Source: Springer Nature journal article supplement (doi:10.1038/s41598-024-52246-6), 2024-01-21

9/22/22 Thyl Brain Lysates <sup>Lot 10</sup> ~~10~~  
 15 second exposure

OVX+E2      OVX<sup>OSP</sup>      SHAM  
 24415V 24414V 2446V 333V 2447V 182V 125V 120V 119V

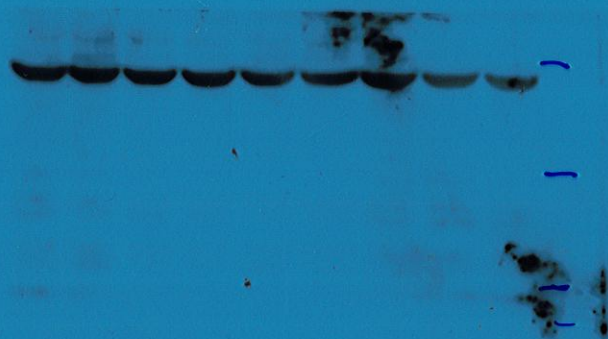

STRATAGENE



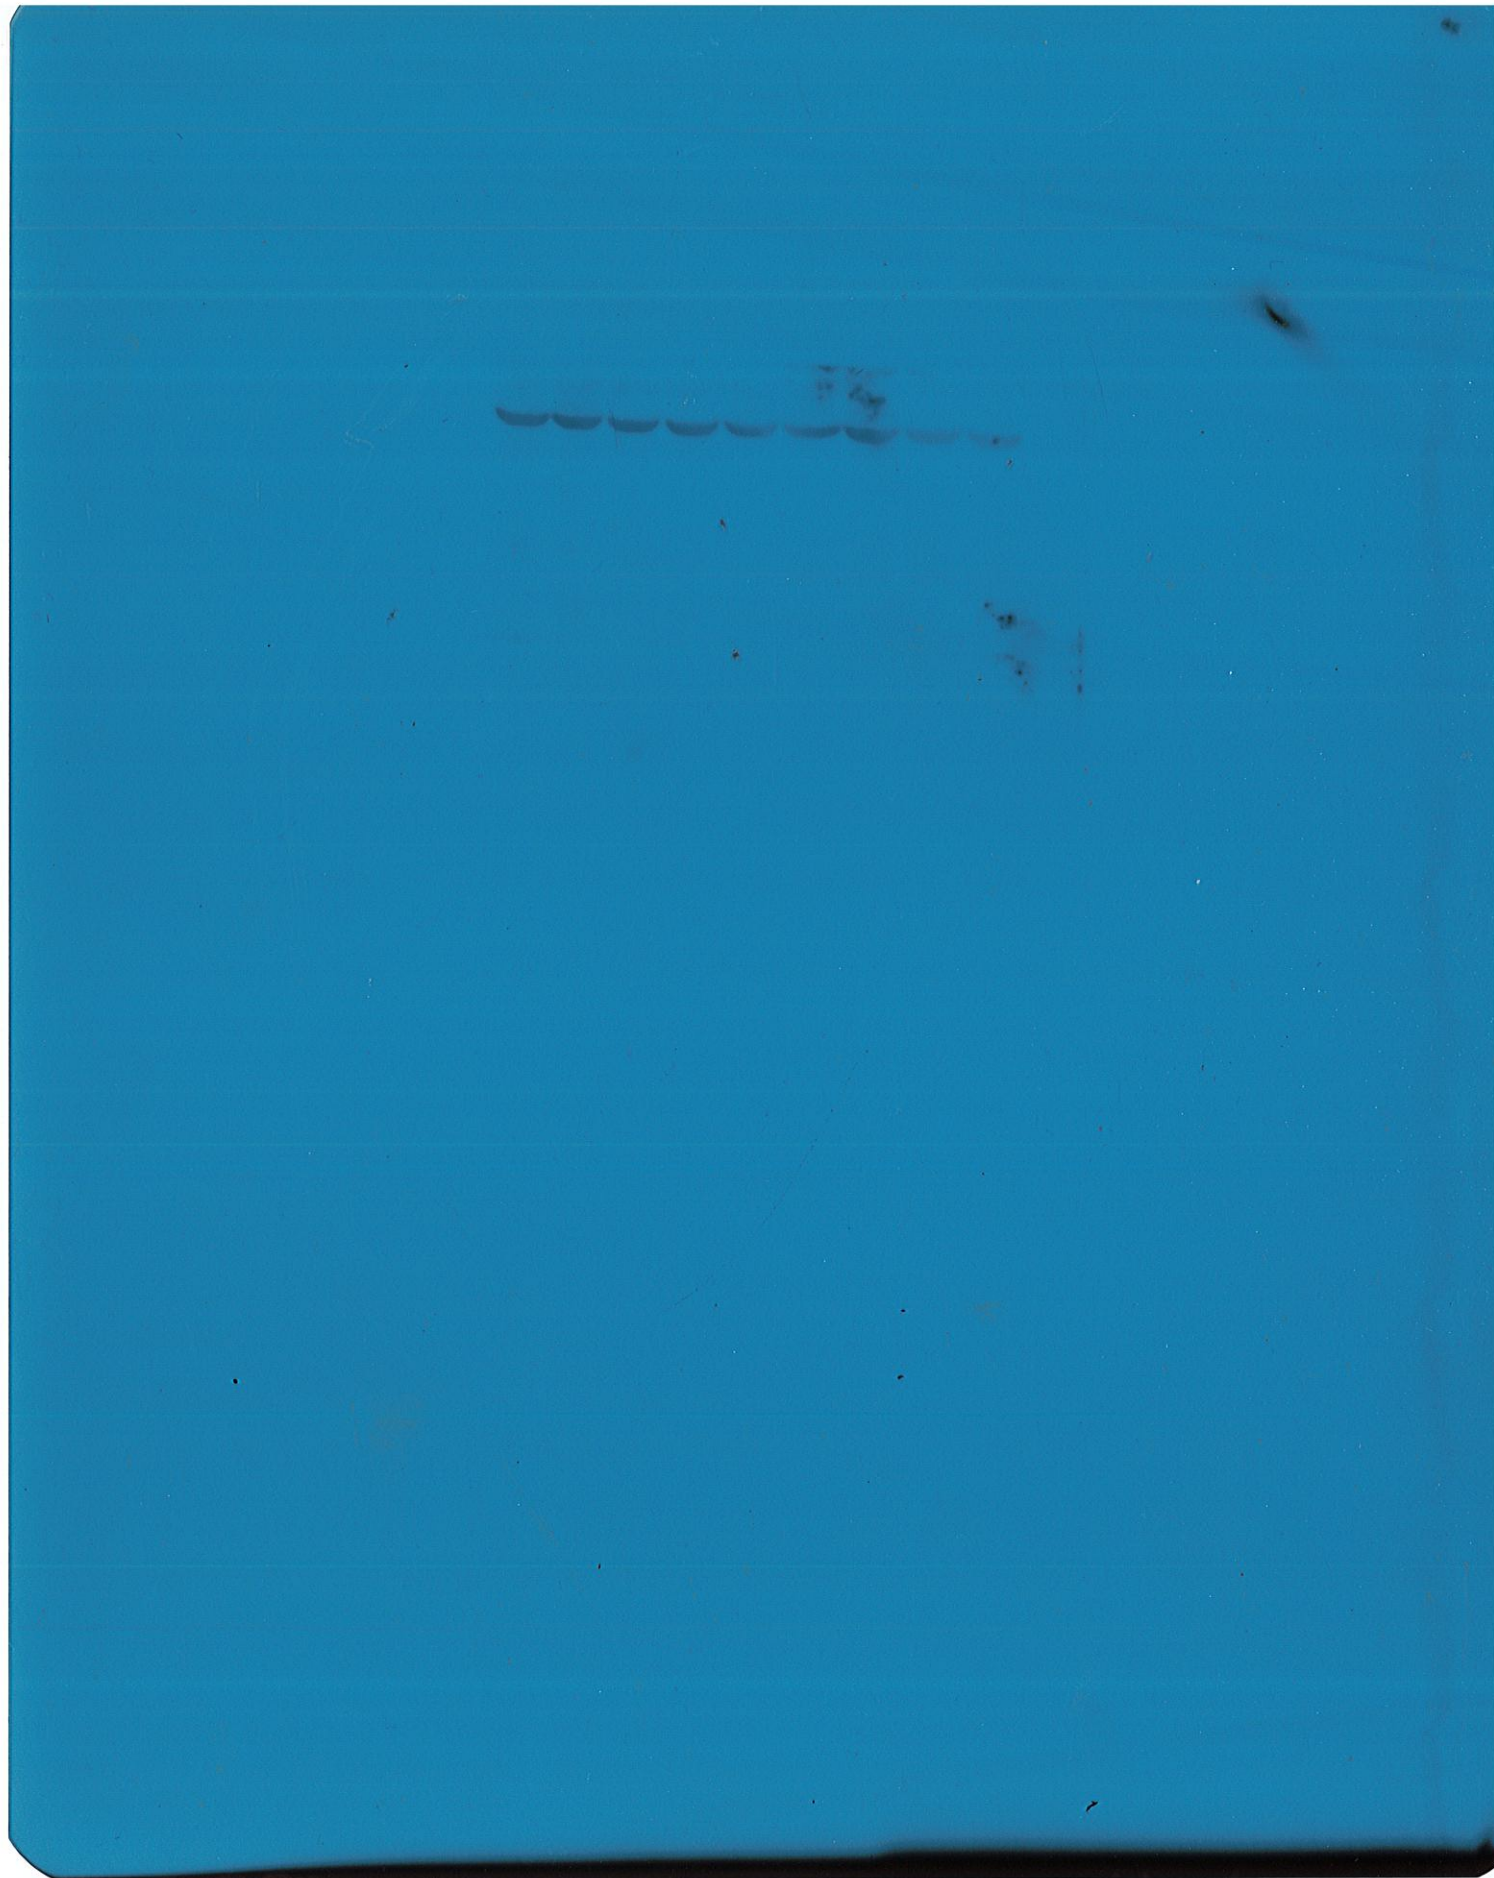



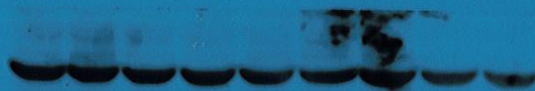



9/23/22

Thyl Brain Lysates - 6E10 1°

20 second exposure

85P

21445V

21444V 21443V 1333V 2147V 182V 125V 124V 119V

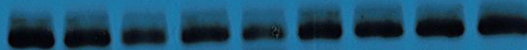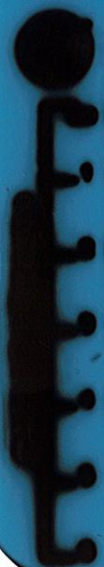



-----

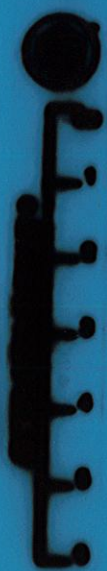



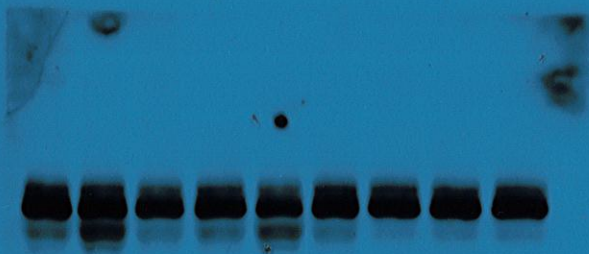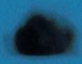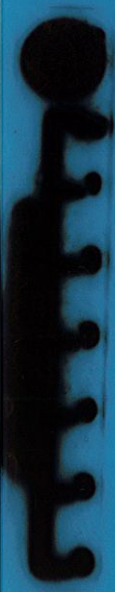

Supplement: MOESM3 [file 41598_2024_52246_MOESM3_ESM.pdf › 41598_2024_52246_MOESM3_ESM.pdf]
